# Supplementary material for: Six CoIIcoordination polymers exhibiting UV-light-driven photocatalysis for the degradation of organic dyes
Source: Royal Society of Chemistry journal article supplement (doi:10.1039/d1ce00345c), 2021-01-01
Supplement: d1ce00345c1.pdf [file d1ce00345c1.pdf]

## Six Co<sup>II</sup> Coordination polymers Manifesting UV-light-driven Photocatalysis for the Degradation of Organic Dyes

Xue Lu,<sup>1a</sup> Ying Zhao,<sup>1a</sup> Xiu-Li Wang,<sup>\*a</sup> Guo-Cheng Liu,<sup>a</sup> Na Xu,<sup>a</sup> Hong-Yan Lin<sup>a</sup> and Xiang Wang<sup>a</sup>

<sup>a</sup> College of Chemistry and Chemical Engineering, Professional Technology Innovation Center of Liaoning Province for Conversion Materials of Solar Cell, Bohai University, Jinzhou, 121000, P. R. China.

### Materials and characterization

All purchased chemical reagents are analytically pure and not further purified when used. The 4-bmpnd ligand was synthesized according to the reported literature.<sup>S1</sup> IR spectra (KBr pellets) were measured using a Varian 640 FT-IR spectrometer at wavenumbers between 400 and 4000 cm<sup>-1</sup>. Powder X-ray diffraction (PXRD) data were taken on a D/teX Ultra diffractometer equipped with Cu-K $\alpha$  ( $\lambda = 1.5406 \text{ \AA}$ ) radiation over the  $2\theta$  range of 5–50°; The solid-state diffuse-reflectance UV/vis spectra for powder samples were recorded with a Perkin-Elmer Lambda 750 UV/vis spectrometer equipped with an integrating sphere by using BaSO<sub>4</sub> as a white standard; UV-vis absorption spectra were obtained by using a SP-1901 UV-vis spectrophotometer.

### X-Ray crystallography

The crystal data of CPs **1–6** were collected on a Bruker SMART APEX II diffractometer at 296K. In the collection process, a CCD area detector and graphite-monochromatic Cu-K $\alpha$  ( $\lambda = 0.71073 \text{ \AA}$ ) with the  $\varphi$ - $\omega$  scan technique was adopted. The structure was resolved by direct methods. The crystal data were refined by full-matrix least squares on  $F^2$  by using the SHELXS-2014 programs.<sup>S2</sup> Crystallographic data and details of structural refinement for **1–6** are summarized in Table 1. Selected bond lengths and angles of the CPs **1–6** were listed in Table S1 in the Supporting Information and the crystallographic data in CIF format are available freely from the Cambridge Crystallography Data Centre (CCDC) via [www.ccdc.cam.ac.uk/conts/retrieving.html](http://www.ccdc.cam.ac.uk/conts/retrieving.html). The CCDC numbers of CPs **1–6** are 1916792, 1916794, 1916797, 1916795, and 1943488–1943489, respectively.

Table S1 Selected bond distances (Å) and angles (°) for complexes 1–6.

| Complex 1                                                                |             |                      |            |
|--------------------------------------------------------------------------|-------------|----------------------|------------|
| Co(1)–O(6)                                                               | 2.0522(15)  | Co(1)–O(6)#1         | 2.0522(15) |
| Co(1)–O(1W)                                                              | 2.1266(15)  | Co(1)–O(1W)#1        | 2.1266(15) |
| Co(1)–N(1)                                                               | 2.1736(18)  | Co(1)–N(1)#1         | 2.1736(19) |
| O(6)–Co(1)–O(6)#1                                                        | 180.00(9)   | O(6)–Co(1)–O(1W)     | 88.27(6)   |
| O(6)#1–Co(1)–O(1W)                                                       | 91.73(6)    | O(6)–Co(1)–O(1W)#1   | 91.73(6)   |
| O(6)#1–Co(1)–O(1W)#1                                                     | 88.27(6)    | O(1W)–Co(1)–O(1W)#1  | 180        |
| O(6)–Co(1)–N(1)#1                                                        | 89.83(6)    | O(6)#1–Co(1)–N(1)#1  | 90.17(6)   |
| O(1W)–Co(1)–N(1)#1                                                       | 92.53(6)    | O(1W)#1–Co(1)–N(1)#1 | 87.47(6)   |
| O(6)–Co(1)–N(1)                                                          | 90.17(6)    | O(6)#1–Co(1)–N(1)    | 89.83(6)   |
| O(1W)–Co(1)–N(1)                                                         | 87.47 (6)   | O(1W)#1–Co(1)–N(1)   | 92.53(6)   |
| N(1)#1–Co(1)–N(1)                                                        | 180         |                      |            |
| Symmetry code for 1: #1: $-x + 1, -y + 1, -z + 1$                        |             |                      |            |
| Complex 2                                                                |             |                      |            |
| Co(1)–O(6)#1                                                             | 2.042(3)    | Co(1)–O(3W)          | 2.124(4)   |
| Co(1)–N(9)                                                               | 2.128(4)    | Co(1)–N(1)           | 2.145(4)   |
| Co(1)–O(12)                                                              | 2.214(4)    | Co(1)–O(11)          | 2.277(4)   |
| Co(2)–O(4)                                                               | 1.950(4)    | Co(2)–N(4)           | 2.061(4)   |
| Co(2)–N(5)                                                               | 2.066(4)    | Co(2)–O(15)#2        | 2.097(4)   |
| O(6)#1–Co(1)–O(1W)                                                       | 90.24(15)   | O(6)#1–Co(1)–N(9)    | 90.32(15)  |
| O(1W)–Co(1)–N(9)                                                         | 177.40(17)  | O(6)#1–Co(1)–N(1)    | 102.23(16) |
| O(1W)–Co(1)–N(1)                                                         | 87.14(16)   | N(9)–Co(1)–N(1)      | 95.21(16)  |
| O(6)#1–Co(1)–O(12)                                                       | 112.09 (14) | O(1W)–Co(1)–O(12)    | 88.01(14)  |
| N(9)–Co(1)–O(12)                                                         | 89.42(15)   | N(1)–Co(1)–O(12)     | 145.35(15) |
| O(6)#1–Co(1)–O(11)                                                       | 170.44(14)  | O(1W)–Co(1)–O(11)    | 88.85(15)  |
| N(9)–Co(1)–O(11)                                                         | 90.15(15)   | N(1)–Co(1)–O(11)     | 87.23(14)  |
| O(12)–Co(1)–O(11)                                                        | 58.37(12)   | O(4)–Co(2)–N(4)      | 111.40(17) |
| O(4)–Co(2)–N(5)                                                          | 103.41(16)  | N(4)–Co(2)–N(5)      | 102.48(17) |
| O(4)–Co(2)–O(15)#2                                                       | 89.80(16)   | N(4)–Co(2)–O(15)#2   | 150.96(18) |
| N(5)–Co(2)–O(15)#2                                                       | 90.96(16)   |                      |            |
| Symmetry code for 2: #1: $-x + 1, -y + 1, -z - 1$ ; #2: $-x, -y, -z - 2$ |             |                      |            |
| Complex 3                                                                |             |                      |            |
| Co(1)–O(10)                                                              | 1.938(2)    | Co(1)–O(5)#1         | 2.000(2)   |
| Co(1)–N(4)#2                                                             | 2.050(3)    | Co(1)–N(6)           | 2.063(3)   |
| Co(2)–O(7)#3                                                             | 1.974(2)    | Co(2)–N(1)           | 2.089(3)   |
| Co(2)–O(4)#4                                                             | 2.103(2)    | Co(2)–N(5)           | 2.214(3)   |
| Co(2)–O(3)#4                                                             | 2.247(3)    | Co(2)–O(1W)          | 2.248(3)   |

**Supplementary Material (ESI) for *Dalton Trans***  
**This journal is © The Royal Society of Chemistry**

|                     |            |                     |            |
|---------------------|------------|---------------------|------------|
| O(10)–Co(1)–O(5)#1  | 101.42(11) | O(10)–Co(1)–N(4)#2  | 104.70(12) |
| O(5)#1–Co(1)–N(4)#2 | 123.97(12) | O(10)–Co(1)–N(6)    | 107.13(11) |
| O(5)#1–Co(1)–N(6)   | 105.63(11) | N(4)#2–Co(1)–N(6)   | 112.41(12) |
| O(7)#3–Co(2)–N(1)   | 103.31(12) | O(7)#3–Co(2)–O(4)#4 | 100.92(11) |
| N(1)–Co(2)–O(4)#4   | 153.17(11) | O(7)#3–Co(2)–N(5)   | 94.56(11)  |
| N(1)–Co(2)–N(5)     | 96.93(11)  | O(4)#4–Co(2)–N(5)   | 92.46(11)  |
| O(7)#3–Co(2)–O(3)#4 | 161.01(11) | N(1)–Co(2)–O(3)#4   | 95.36(11)  |
| O(4)#4–Co(2)–O(3)#4 | 60.09(9)   | N(5)–Co(2)–O(3)#4   | 86.52(11)  |
| O(7)#3–Co(2)–O(1W)  | 82.12(12)  | N(1)–Co(2)–O(1W)    | 90.66(13)  |
| O(4)#4–Co(2)–O(1W)  | 81.36(12)  | N(5)–Co(2)–O(1W)    | 172.25(12) |
| O(3)#4–Co(2)–O(1W)  | 94.35(11)  |                     |            |

Symmetry code for **3**: #1:  $x, y - 1, z$ ; #2:  $-x - 2, y + 1/2, -z + 1/2$ ; #3:  $x + 1, y, z$ ; #4:  $x, y + 1, z$

**Complex 4**

|                      |            |                      |            |
|----------------------|------------|----------------------|------------|
| Co(1)–O(4)#1         | 2.0224(13) | Co(1)–O(3)#2         | 2.0227(13) |
| Co(1)–O(5)#3         | 2.0378(13) | Co(1)–N(1)           | 2.0617(15) |
| Co(1)–O(2)           | 2.0799(14) | Co(1)–Co(1)#2        | 2.7346(5)  |
| O(4)#1–Co(1)–O(3)#2  | 91.73(6)   | O(4)#1–Co(1)–O(5)#3  | 165.56(6)  |
| O(3)#2–Co(1)–O(5)#3  | 88.43(7)   | O(4)#1–Co(1)–N(1)    | 100.03(6)  |
| O(3)#2–Co(1)–N(1)    | 105.83(6)  | O(5)#3–Co(1)–N1      | 93.81(6)   |
| O(4)#1–Co(1)–O(2)    | 89.81(6)   | O(3)#2–Co(1)–O(2)    | 165.31(6)  |
| O(5)#3–Co(1)–O(2)    | 86.48(7)   | N(1)–Co(1)–O(2)      | 88.27(6)   |
| O(4)#1–Co(1)–Co(1)#2 | 86.38(4)   | O(3)#2–Co(1)–Co(1)#2 | 91.74(5)   |
| O(5)#3–Co(1)–Co(1)#2 | 79.18(4)   | N(1)–Co(1)–Co(1)#2   | 160.98(5)  |
| O(2)–Co(1)–Co(1)#2   | 73.77(5)   |                      |            |

Symmetry code for **4**: #1:  $x - 1, y, z$ ; #2:  $-x + 1, -y - 1, -z - 1$ ; #3:  $-x + 2, -y - 1, -z - 1$

**Complex 5**

|                      |            |                      |            |
|----------------------|------------|----------------------|------------|
| Co(1)–O(1)           | 2.1050(19) | Co(1)–O(1)#1         | 2.1050(19) |
| Co(1)–O(1W)          | 2.0972(18) | Co(1)–O(1W) #1       | 2.0971(18) |
| Co(1)–N(1)           | 2.176(10)  | Co(1)–N(1) #1        | 2.176(10)  |
| Co(2)–O(4)           | 2.0941(18) | Co(2)–O(4)#2         | 2.0941(18) |
| Co(2)–N(2)           | 2.171(2)   | Co(2)–N(2)#2         | 2.171(2)   |
| Co(2)–O(2W)          | 2.0958(19) | Co(2)–O(2W)#2        | 2.096(2)   |
| O(1W)#1–Co(1)–O(1W)  | 180.0      | O(1W)–Co(1)–O(1)     | 89.92(8)   |
| O(1W)#1–Co(1)–O(1)   | 90.8(8)    | O(1W)–Co(1)–O(1)#1   | 90.08(8)   |
| O(1W)#1–Co(1)–O(1)#1 | 89.92(8)   | O(1W)#1–Co(1)–N(1)#1 | 86.7(3)    |
| O(1W)–Co(1)–N(1)#1   | 93.9(3)    | O(1W)–Co(1)–N(1)     | 86.7(3)    |
| O(1W)#1–Co(1)–N(1)   | 93.3(3)    | O(1)#1–Co(1)–O(1)    | 180.0      |
| O(1)–Co(1)–N(1)      | 89.5(3)    | O(1)#1–Co(1)–N(1)#1  | 89.5(3)    |
| O(1)#1–Co(1)–N(1)    | 90.5(3)    | O(1)–Co(1)–N(1)#1    | 90.5(3)    |

**Supplementary Material (ESI) for *Dalton Trans***  
**This journal is © The Royal Society of Chemistry**

---

|                     |          |                      |           |
|---------------------|----------|----------------------|-----------|
| O(4)#2–Co(2)–N(2)#2 | 90.79(8) | O(4)–Co(2)–N(2)      | 90.79(8)  |
| O(4)–Co(2)–N(2)#2   | 89.21(8) | O(4)#2–Co(2)–N(2)    | 89.21(8)  |
| O(4)#2–Co(2)–O(2W)  | 90.25(8) | O(4)#2–Co(2)–O(2W)#2 | 89.75(8)  |
| O(4)–Co(2)–O(2W)    | 89.75(8) | O(4)–Co(2)–O(2W)#2   | 90.25(8)  |
| N(2)–Co(2)–N(2)#2   | 180.0    | N(2)–Co(2)–O(2W)     | 92.15(9)  |
| N(2)–Co(2)–O(2W)#2  | 87.85(9) | N(2)#2–Co(2)–O(2W)#2 | 92.15(9)  |
| O(2W)–Co(2)–N(2)#2  | 87.85(9) | O(2W)–Co(2)–O(2W)#2  | 180.00(9) |

Symmetry code for **5**: #1:  $-x, -y, -z$ ; #2:  $-1 - x, 1 - y, 1 - z$

---

**Complex 6**

|                     |          |                    |          |
|---------------------|----------|--------------------|----------|
| Co(1)–O(1)          | 2.158(5) | Co(1)–O(1W)        | 2.058(6) |
| Co(1)–O(3)#1        | 2.107(5) | Co(1)–O(4)         | 2.099(5) |
| Co(1)–N(1)#2        | 2.166(7) | Co(1)–N(4)         | 2.185(7) |
| O(1)–Co(1)–N(1)#1   | 90.3(2)  | O(1)–Co(1)–N(4)    | 85.7(2)  |
| O(1W)–Co(1)–O(1)    | 89.1(2)  | O(1W)–Co(1)–O(3)#2 | 91.9(2)  |
| O(1W)–Co(1)–O(4)    | 172.0(2) | O(1W)–Co(1)–N(1)#1 | 89.3(2)  |
| O(1W)–Co(1)–N(4)    | 89.9(3)  | O(3)#2–Co(1)–O(1)  | 170.8(2) |
| O(3)#2–Co(1)–N(1)#1 | 98.9(2)  | O(3) #2–Co(1)–N(4) | 85.1(2)  |
| O(4)–Co(1)–O(1)     | 83.0(2)  | O(4)–Co(1)–O(3)#2  | 96.0(2)  |
| N(1)#1–Co(1)–N(4)   | 175.9(3) |                    |          |

Symmetry code for **6**: #1:  $-x + 1, -y, -z + 2$ ; #2:  $x - 1, +y, 3/2 - z$

---

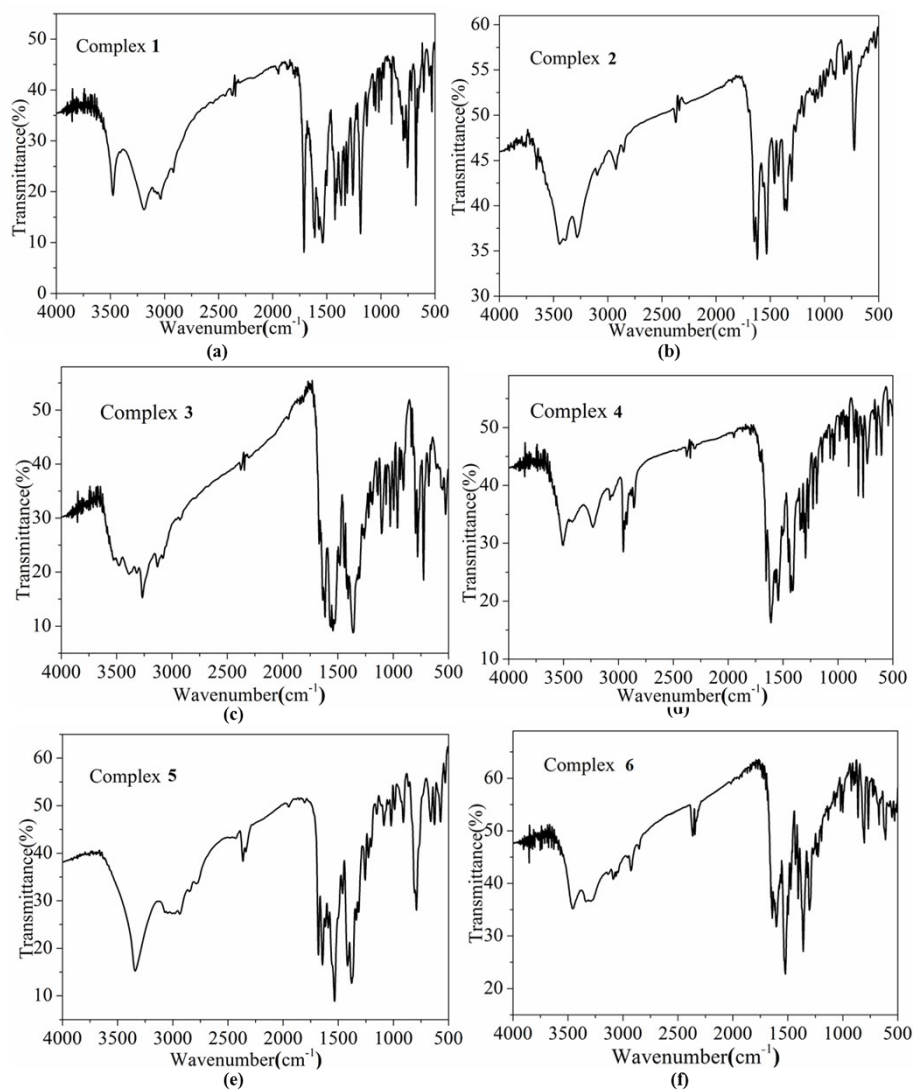

Fig. S1 The IR spectra of complexes 1–6.

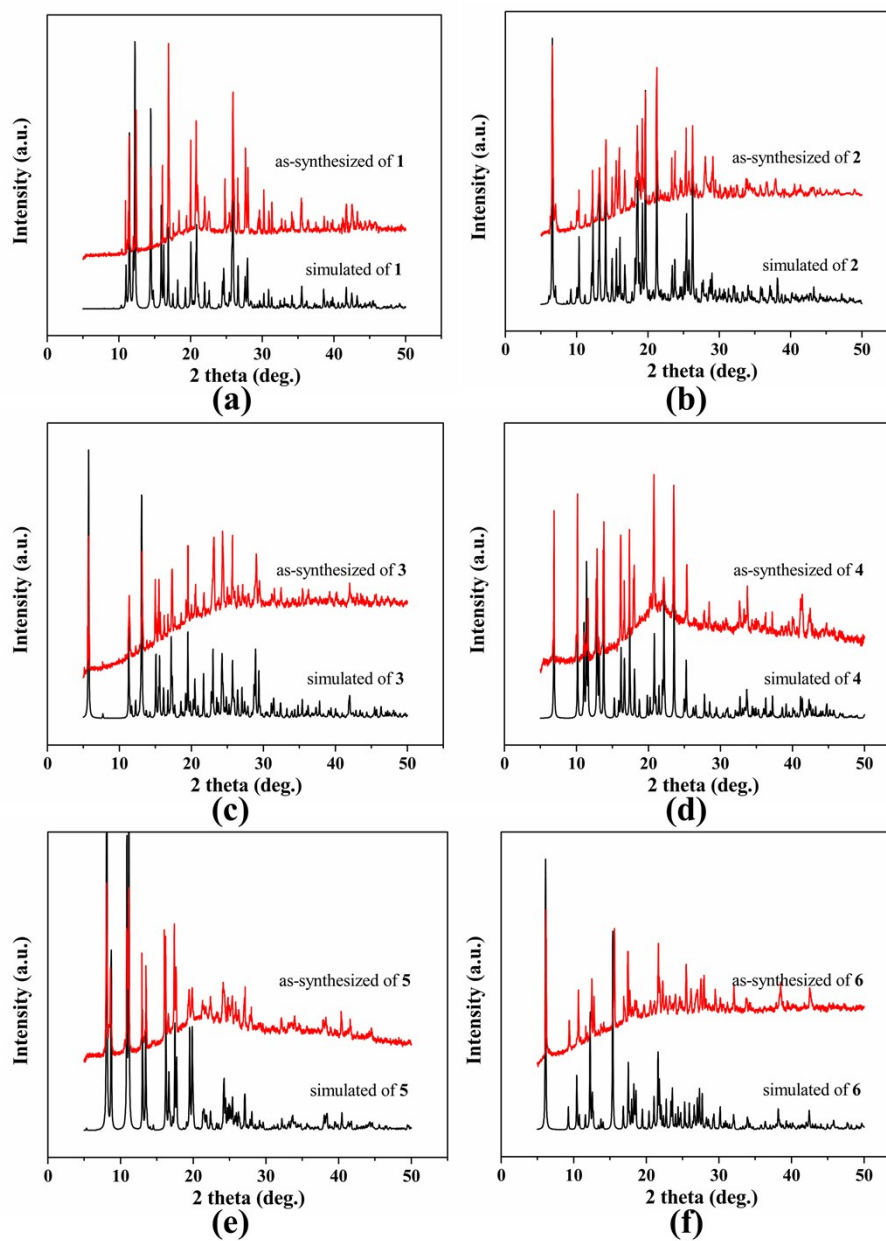

Fig. S2 The PXRD patterns of complexes 1–6.

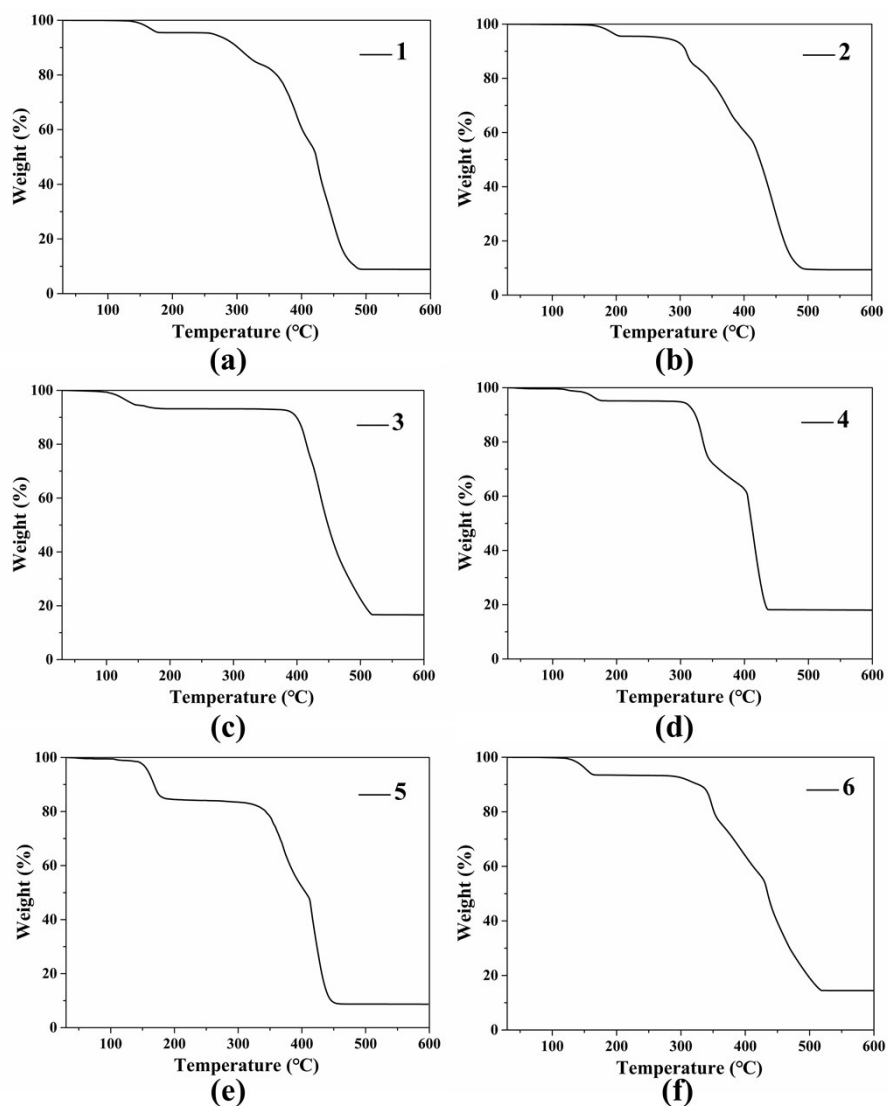

Fig. S3 The TG curves of complexes 1–6.

**Table S2** The coordination modes of Co<sup>II</sup> ions, 4-bmpnd and polycarboxylates in complexes 1–6.

| Complex      | 1                                                                                  | 2                                                                                  | 3                                                                                  | 4                                                                                  | 5                                                                                   | 6                                                                                    |
|--------------|------------------------------------------------------------------------------------|------------------------------------------------------------------------------------|------------------------------------------------------------------------------------|------------------------------------------------------------------------------------|-------------------------------------------------------------------------------------|--------------------------------------------------------------------------------------|
| Metal ions   | 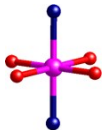  |   |   |  |  |   |
| N-donors     |   |   |   |  |  |   |
| Carboxylates |  |  |  |  |  |  |

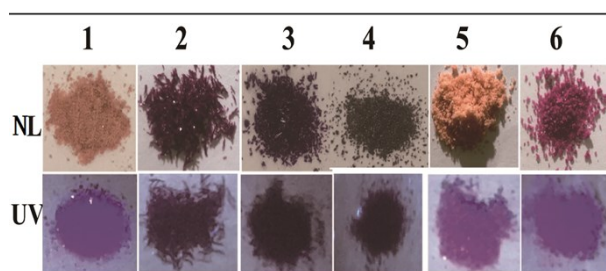

**Fig. S4** The photographs of solid-state sample of complexes 1–6 at room temperature. (NL= normal light, UV=ultraviolet)



Table S3 The structures and nature of organic dyes

| Dye name                 | Chemical structures                                                                 | Ionicity | Size (nm <sup>3</sup> ) | Absorption<br>λ max (nm) |
|--------------------------|-------------------------------------------------------------------------------------|----------|-------------------------|--------------------------|
| Congo Red<br>(CR)        | 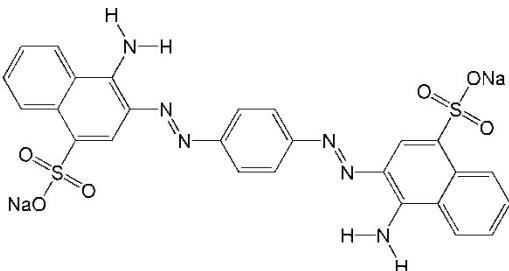   | Anionic  | 2.61*0.86*0.39          | 493                      |
| Methyl<br>Orange<br>(MO) |    | Anionic  | 1.54*0.48*0.28          | 467                      |
| Rhodamine<br>B (RhB)     |   | Cationic | 1.56*1.35*0.42          | 552                      |
| Methylene<br>Blue (MB)   |  | Cationic | 1.38*0.64*0.21          | 672                      |

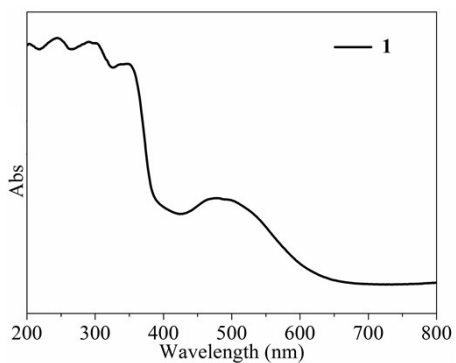

(a)

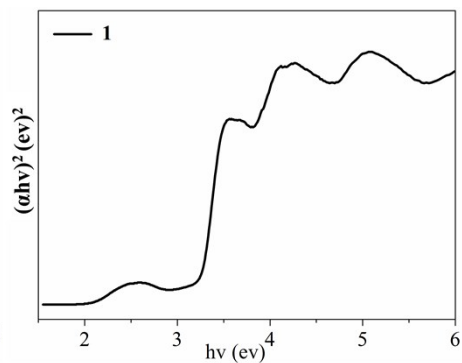

(b)

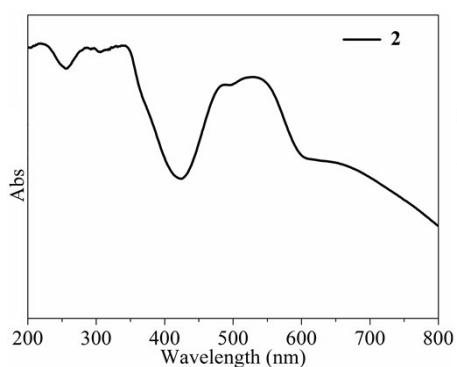

(c)

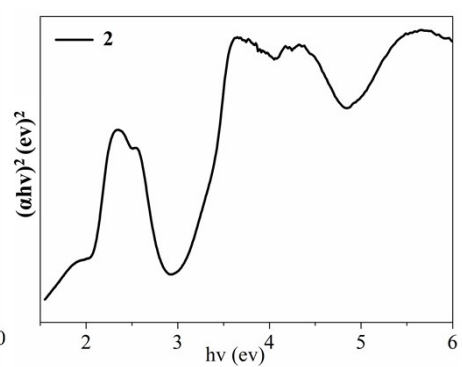

(d)

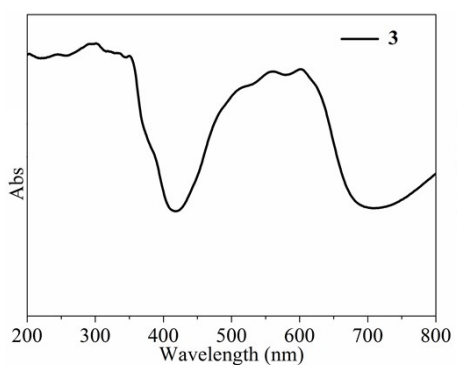

(e)

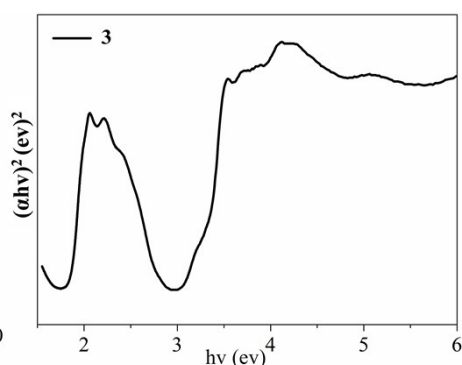

(f)

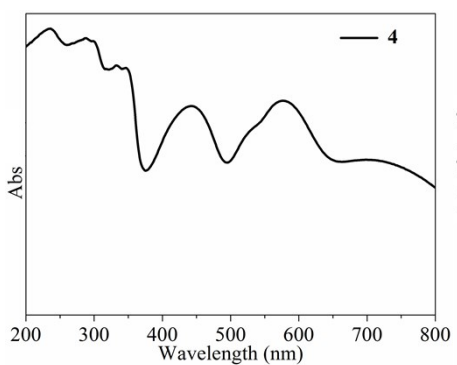

(g)

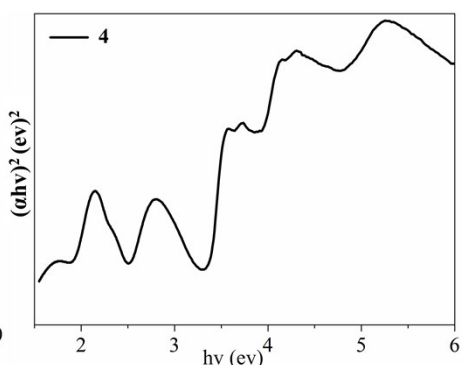

(h)

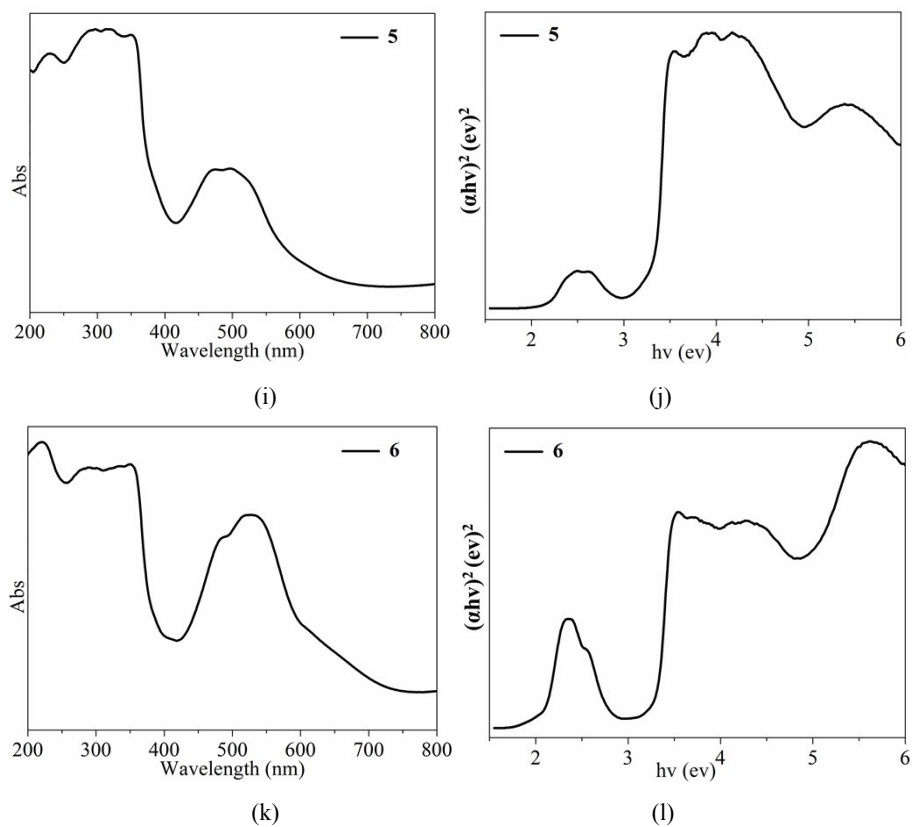

**Fig. S5** UV-vis solid state diffuse-reflectance spectra and optical absorption spectra of complexes 1–6.

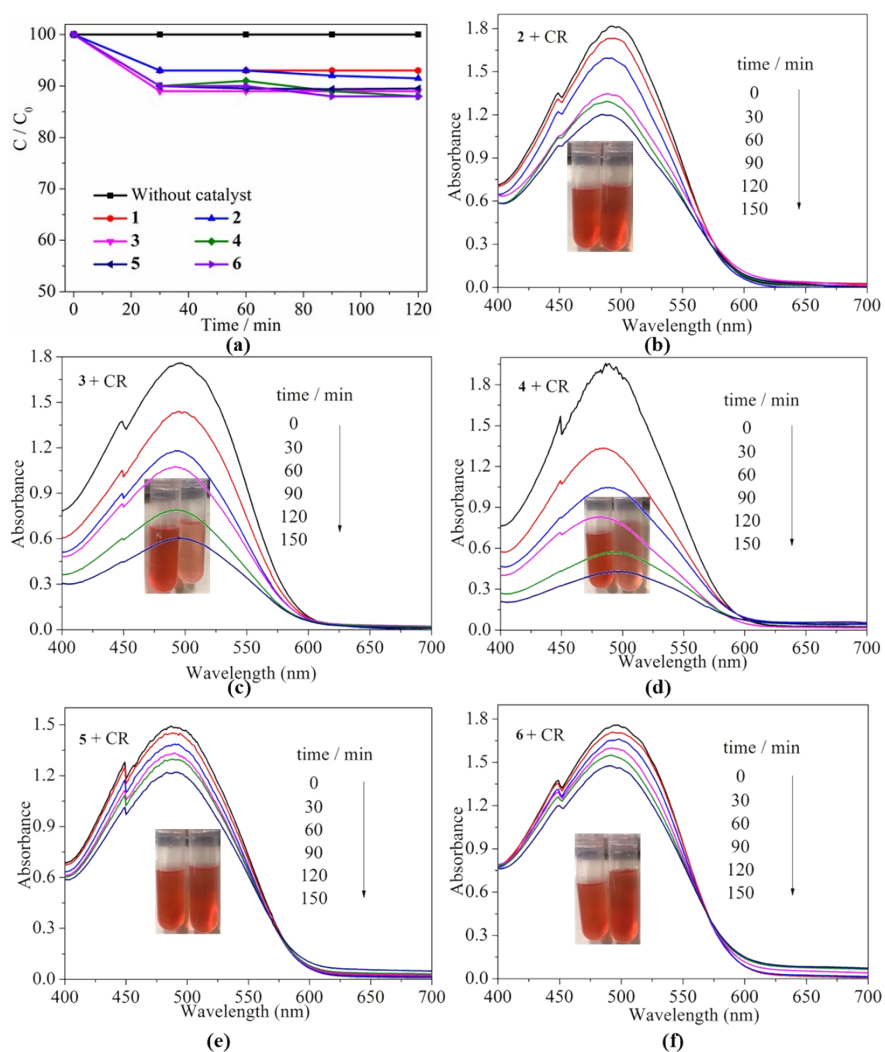

**Fig. S6** The absorption spectra of the CR solution during the decomposition reaction with the presence of complexes **1–6** under dark (a) and complexes **2–6** under UV irradiation (b–f).

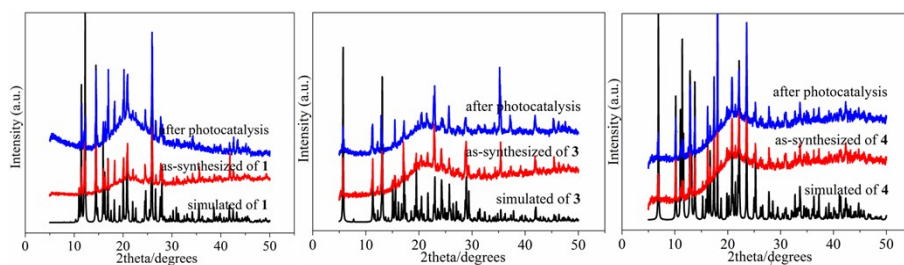

**Fig. S7** The PXRD of complexes **1, 3** and **4** after photocatalytic degradation of CR.

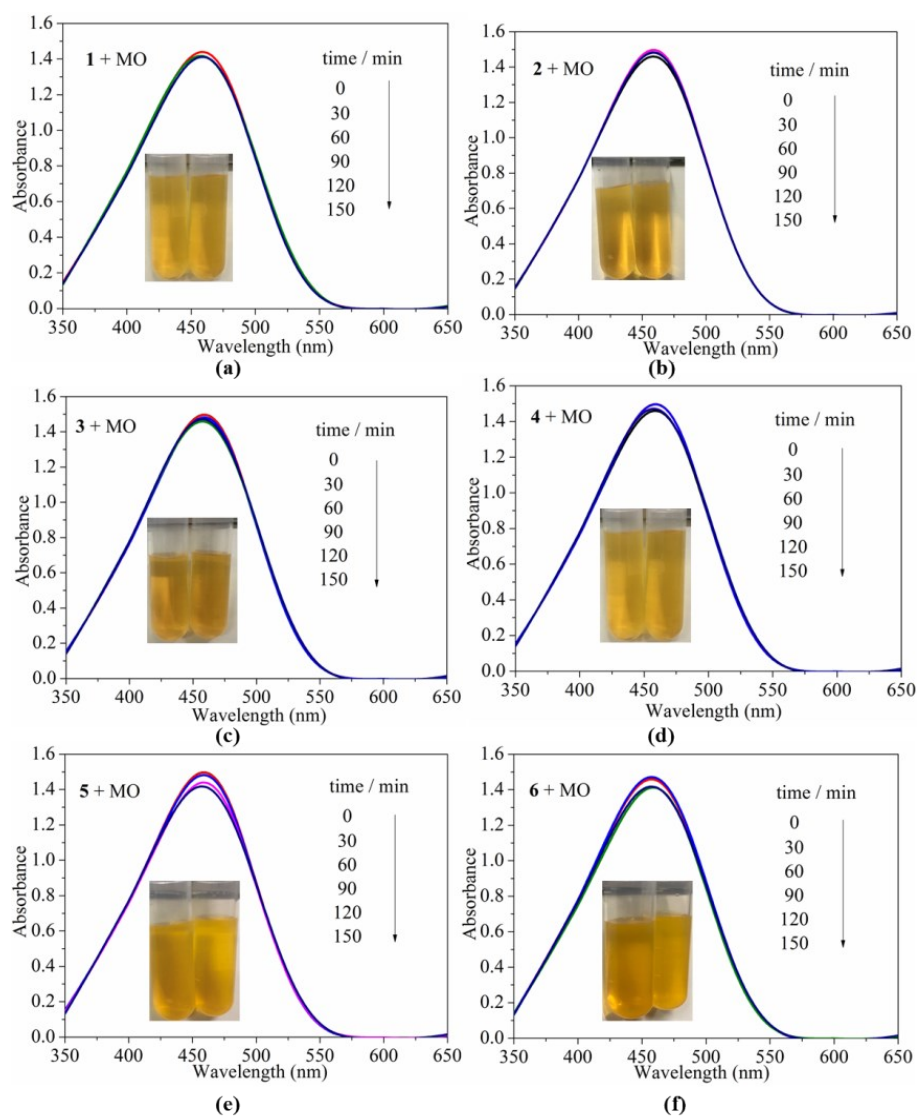

**Fig. S8** The absorption spectra of the MO solution during the decomposition reaction with the presence of complexes 1-6 (a-f) under UV irradiation.

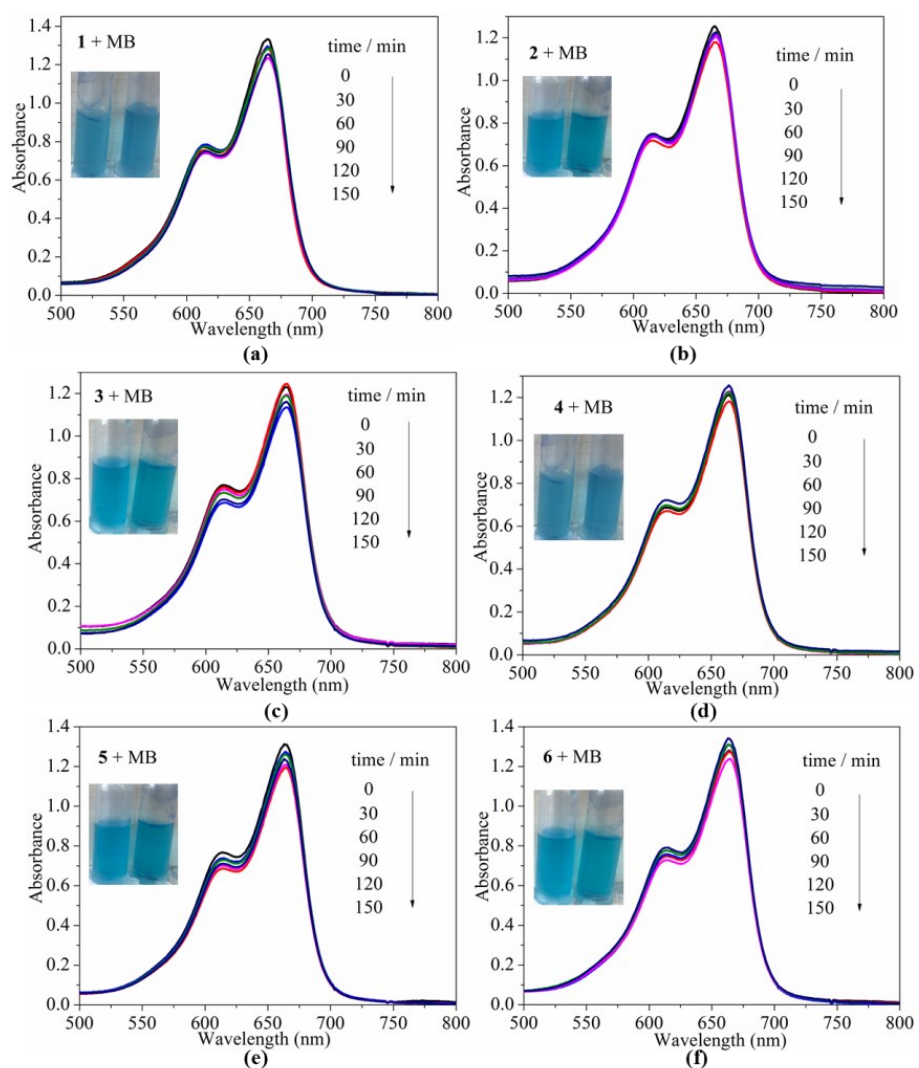

**Fig. S9** The absorption spectra of the MB solution during the decomposition reaction with the presence of complexes **1–6** (a–f) under UV irradiation.

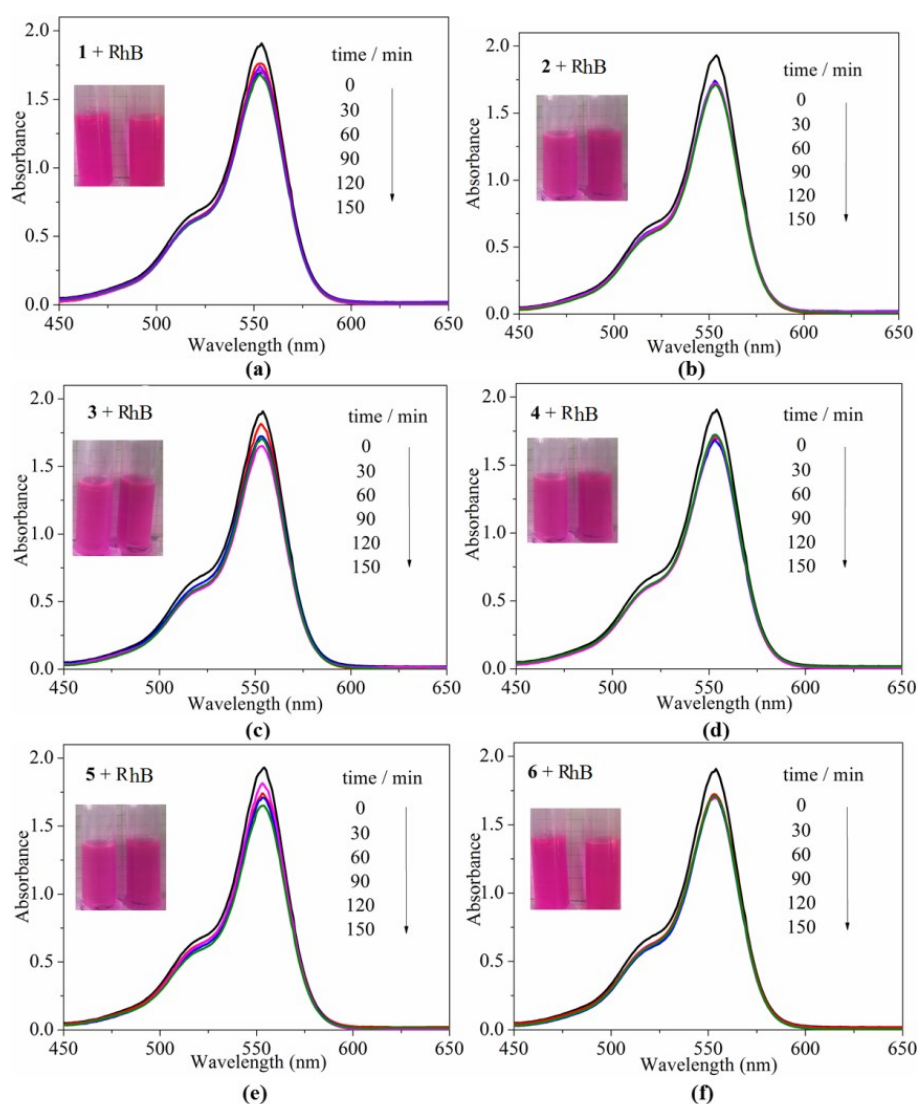

**Fig. S10** The absorption spectra of the RhB solution during the decomposition reaction with the presence of complexes **1–6** (a–f) under UV irradiation.

## References

- S1. X. L. Wang, J. Luan, F. F. Sui, H. Y. Lin, G. C. Liu and C. Xu, *Cryst. Growth Des.*, 2013, **13**, 3561–3576.
- S2. M. Sarka and K. Biradha, *Cryst. Growth Des.*, 2006, **61**, 202–208.
